# Supplementary material for: Alteration of brain network centrality in CTN patients after a single triggering pain
Source: PubMed Central journal article supplement (PMC9978223; doi:10.3389/fnins.2023.1109684), 2023-02-16
Supplement: Data_Sheet_1.pdf [file Data_Sheet_1.pdf]

Table S1 The dynamic degree centrality difference in CTN patients among different time points with the step size of 5 TRs (10 s).

| Brain region | Side | Peak MNI coordinates |   |   | Cluster size (voxels) | Peak intensity | F value | P value | Post hoc P value |                    |               |
|--------------|------|----------------------|---|---|-----------------------|----------------|---------|---------|------------------|--------------------|---------------|
|              |      | X                    | Y | Z |                       |                |         |         | Baseline vs 5 s  | Baseline vs 30 min | 5 s vs 30 min |
|              |      | LING                 | R | 9 |                       |                |         |         | -48              | 0                  | 154           |

MNI, Montreal Neurological Institute; Baseline, the rs-fMRI was performed before stimulating the trigger zone; 5 s, the rs-fMRI was performed within 5 s after stimulating the trigger zone; 30 min, the rs-fMRI was performed in the 30th minute after stimulating the trigger zone; LING.R, right lingual; right; l; R

Table S2. The dynamic degree centrality value (step size of 5 TRs (10 s)) in CTN patients in different time points.

| Brain region | Side | dDC value     |               |               |
|--------------|------|---------------|---------------|---------------|
|              |      | Baseline      | 5s            | 30min         |
| LING         | R    | 0.161 ± 0.046 | 0.173 ± 0.079 | 0.199 ± 0.078 |

CTN, classical trigeminal neuralgia; dDC, dynamic degree centrality; Baseline, the rs-fMRI was performed before stimulating the trigger zone; 5 s, the rs-fMRI was performed within 5 s after stimulating the trigger zone; 30 min, the rs-fMRI was performed in the 30th minute after stimulating the trigger zone; LING, lingual; R, right.

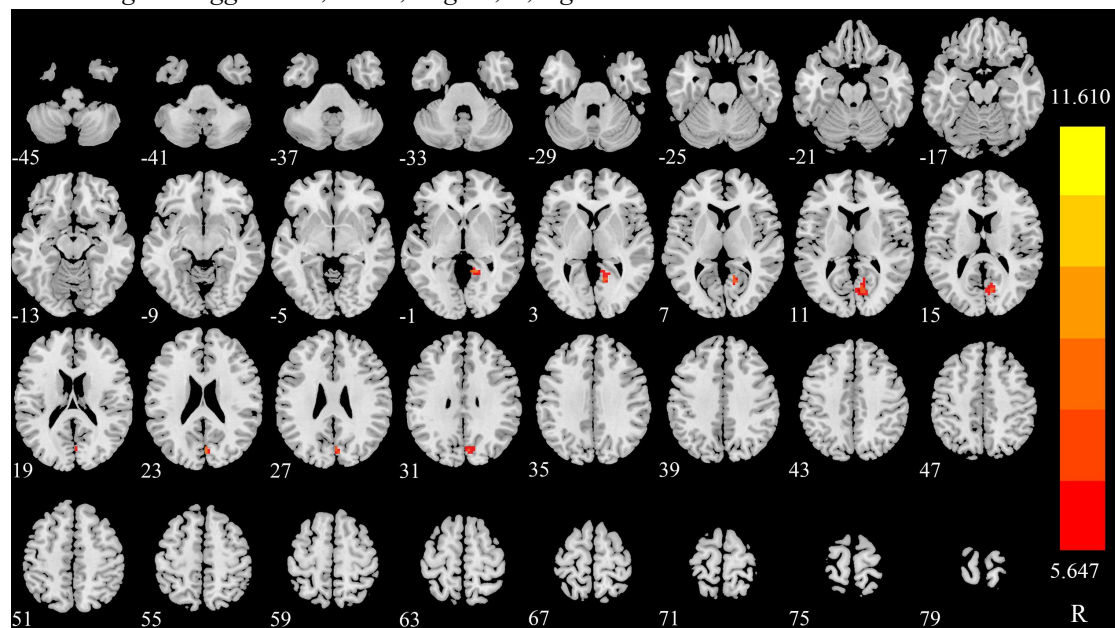

Figure S1. Significant differences in dDC among different times in patients with CTN. dDC, Dynamic degree centrality; CTN, classical trigeminal neuralgia.

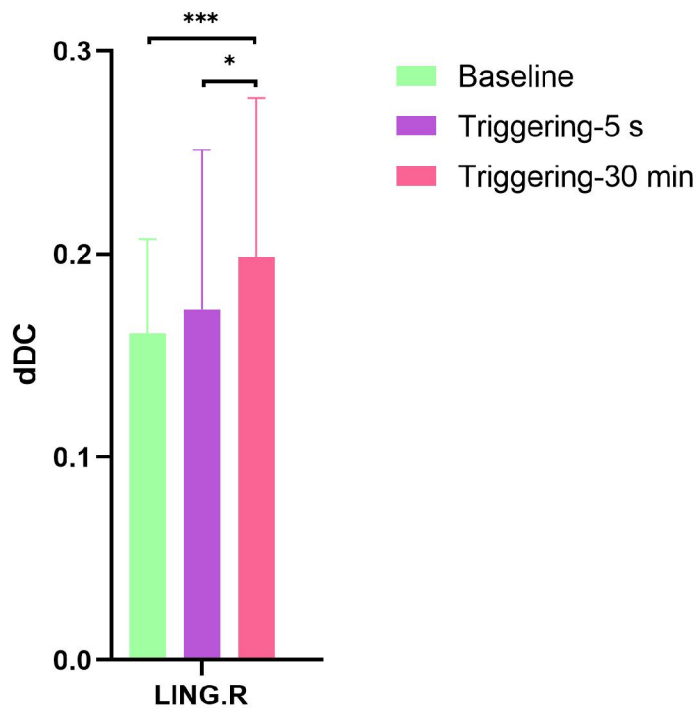

Figure S2. *Post hoc* comparisons of analysis of variance. The connection between two bars represents significant between-time differences of dDC (\*represents significant level  $P < 0.05$ , \*\*denotes significant level  $P < 0.01$ , and \*\*\* indicates significant level  $P < 0.001$ , Bonferroni correction). dDC, Dynamic degree centrality; baseline, the rs-fMRI was performed before stimulating the trigger zone; triggering-5 s, the rs-fMRI was performed within 5 s after stimulating the trigger zone; triggering-30 min, the rs-fMRI was performed in the 30th minute after stimulating the trigger zone; LING.R, right lingual.

Table S3 The sDC and dDC values in CTN patients among different time points.

| Method | Brain region | Side | value             |                   |                   |
|--------|--------------|------|-------------------|-------------------|-------------------|
|        |              |      | Baseline          | 5s                | 30min             |
| sDC    | CAU          | R    | $0.865 \pm 0.134$ | $1.036 \pm 0.199$ | $0.904 \pm 0.208$ |
|        | FFG          | R    | $0.991 \pm 0.179$ | $1.243 \pm 0.307$ | $1.156 \pm 0.332$ |
|        | MTG          | R    | $0.851 \pm 0.099$ | $1.018 \pm 0.168$ | $0.858 \pm 0.138$ |
|        | ORBmid       | R    | $1.050 \pm 0.169$ | $1.267 \pm 0.223$ | $1.171 \pm 0.199$ |
|        | SFG          | R    | $0.674 \pm 0.148$ | $0.566 \pm 0.151$ | $0.621 \pm 0.161$ |
|        | SFG          | L    | $0.703 \pm 0.187$ | $0.585 \pm 0.167$ | $0.670 \pm 0.214$ |
|        | dDC*         | LING | R                 | $0.160 \pm 0.046$ | $0.171 \pm 0.078$ |

*sDC, static degree centrality; dDC, Dynamic degree centrality; Baseline, the rs-fMRI was performed before stimulating the trigger zone; 5 s, the rs-fMRI was performed within 5 s after stimulating the trigger zone; 30 min, the rs-fMRI was performed in the 30th minute after stimulating the trigger zone; sDC, static degree centrality; dDC, dynamic degree centrality; CAU, caudate nucleus; FFG, fusiform gyrus; MTG, middle temporal gyrus; ORBmid, middle frontal gyrus, orbital part; SFG, superior frontal gyrus; LING, lingual; R, right; L, left. \*step size of 2 TRs (4 s) of dDC in different time.*
